# Supplementary material for: Active Site Gate Dynamics Modulate the Catalytic Activity of the Ubiquitination Enzyme E2-25K
Source: PubMed Central journal article supplement (PMC5934386; doi:10.1038/s41598-018-25476-8), 2018-05-03
Supplement: 41598_2018_25476_MOESM1_ESM.pdf [file 41598_2018_25476_MOESM1_ESM.pdf]

## Supplementary Information

### Active Site Gate Dynamics Modulate the Catalytic Activity of the Ubiquitination Enzyme E2-25K

Manoj K. Rout<sup>†</sup>, Brian L. Lee<sup>†</sup>, Aiyang Lin<sup>‡</sup>, Wei Xiao<sup>‡</sup>, and Leo Spyropoulos<sup>†,\*</sup>

<sup>†</sup>Department of Biochemistry, Faculty of Medicine and Dentistry, University of Alberta, Edmonton, Alberta, Canada T6G 2H7.

<sup>‡</sup>Department of Microbiology and Immunology, University of Saskatchewan, Saskatoon, Saskatchewan, S7N 5E5, Canada.

\*To whom correspondence should be addressed

e-mail: [leo.spyropoulos@ualberta.ca](mailto:leo.spyropoulos@ualberta.ca).

phone: (780) 492-2417

fax: (780) 492-0886

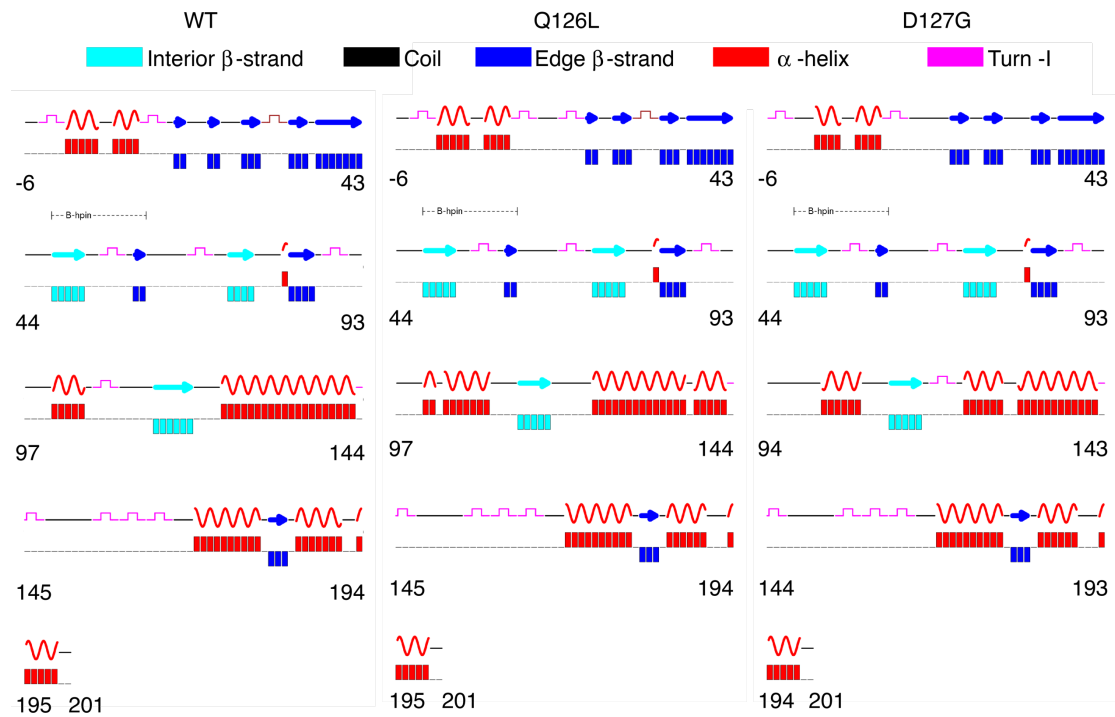

**Supplementary Figure S1:** Predicted secondary structures calculated using  $^{15}\text{N}$ ,  $^1\text{H}$ , CO and CA chemical shifts for wildtype, Q126L, and D127G E2-25K. The overall secondary structures of both the proteins remain similar to wildtype.

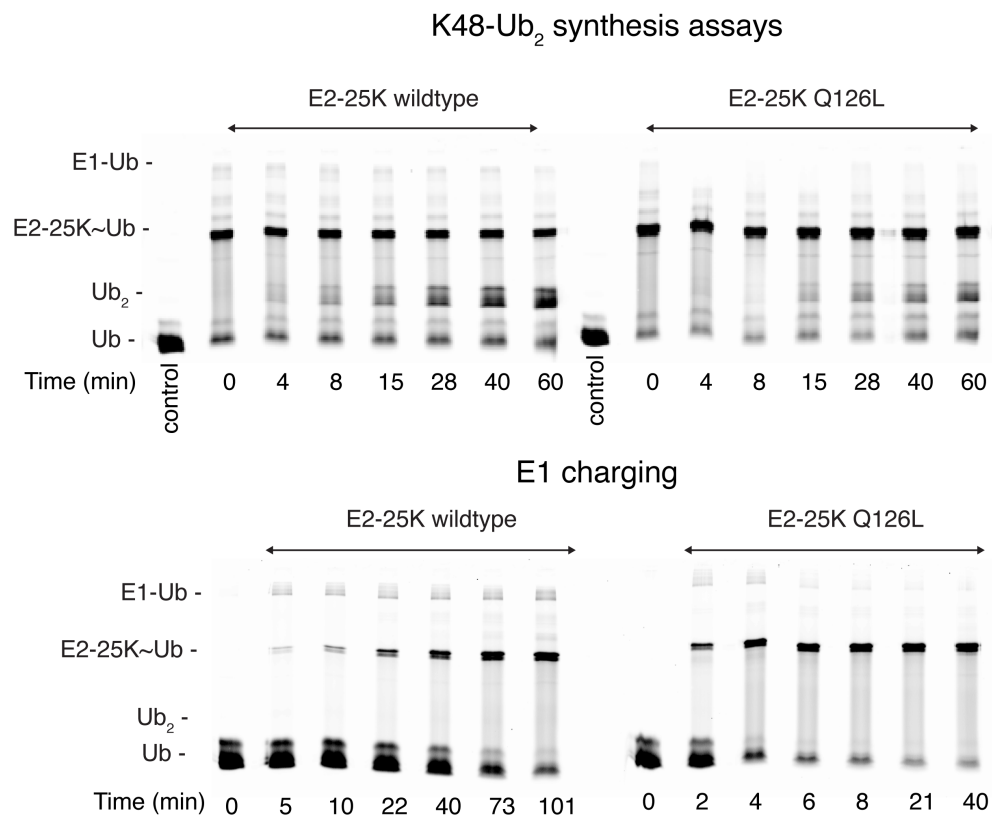

**Supplementary Figure S2:** Representative SDS-PAGE results for E2-25K enzyme assays for catalysis of the synthesis K48-Ub<sub>2</sub> chains (top) and E1-catalyzed charging of E2-25K to form a thioester with the C-terminus of Ub (bottom). Data for wildtype enzyme and the Q126L mutant are shown.

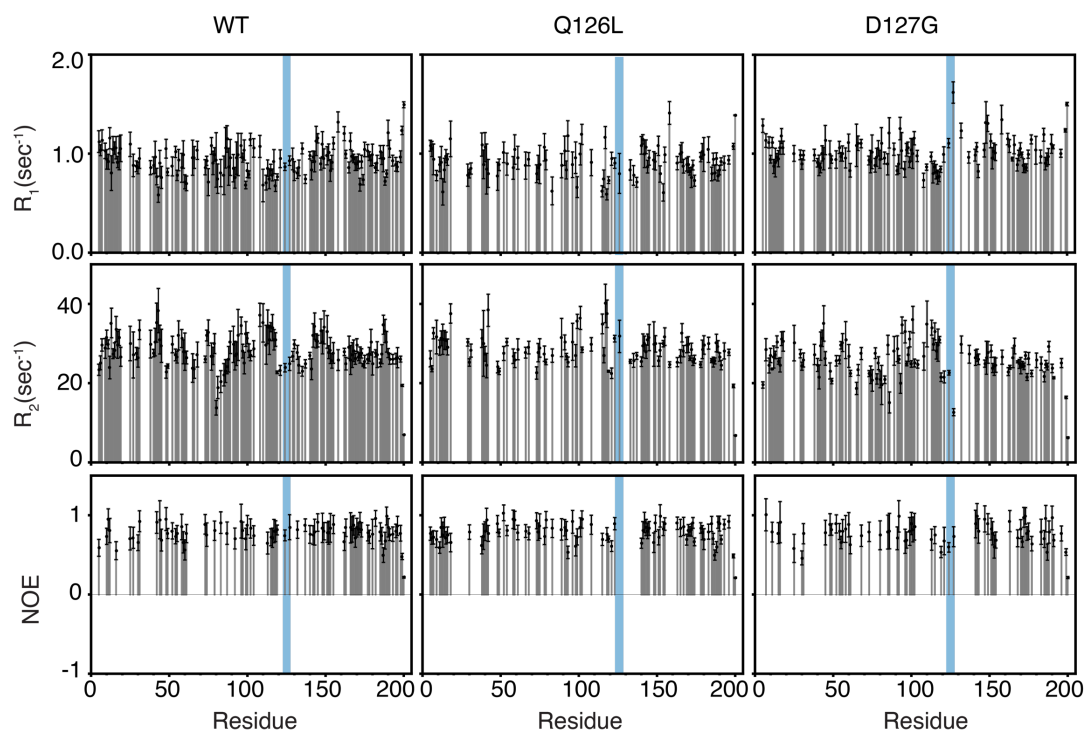

**Supplementary Figure S3.** 600 MHz backbone  $^{15}\text{N}$  relaxation data for E2-25K wildtype, Q126L and D127G. Residues from 123-127 from the active site loop are highlighted with a blue bar.

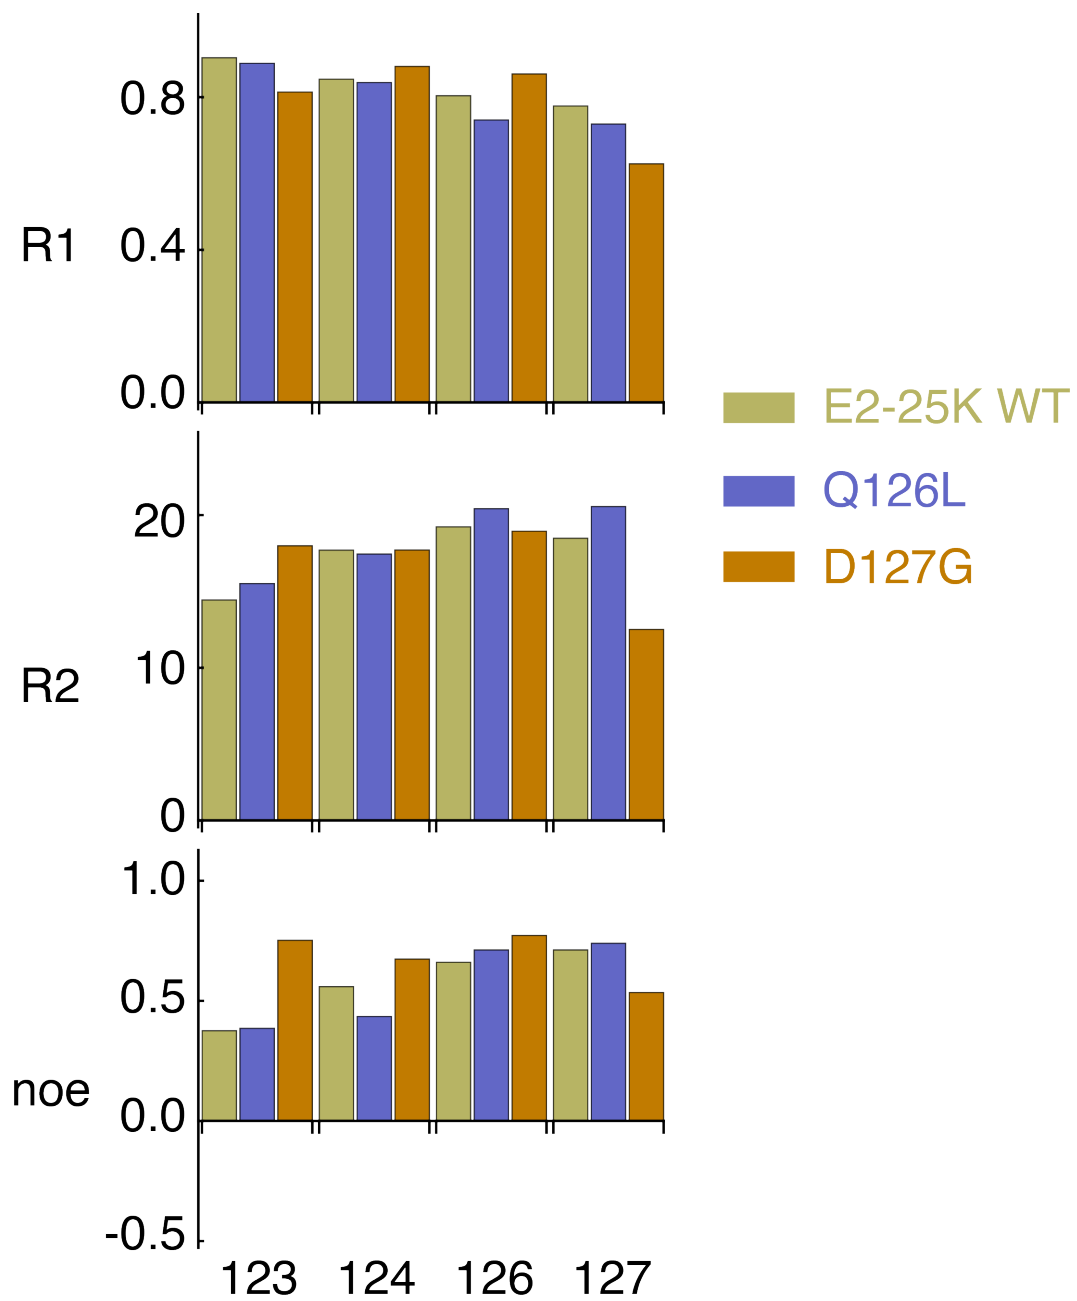

**Supplementary Figure S4.** MD-derived 600 MHz backbone  $^{15}\text{N}$  relaxation data for E2-25K wildtype, Q126L and D127G.

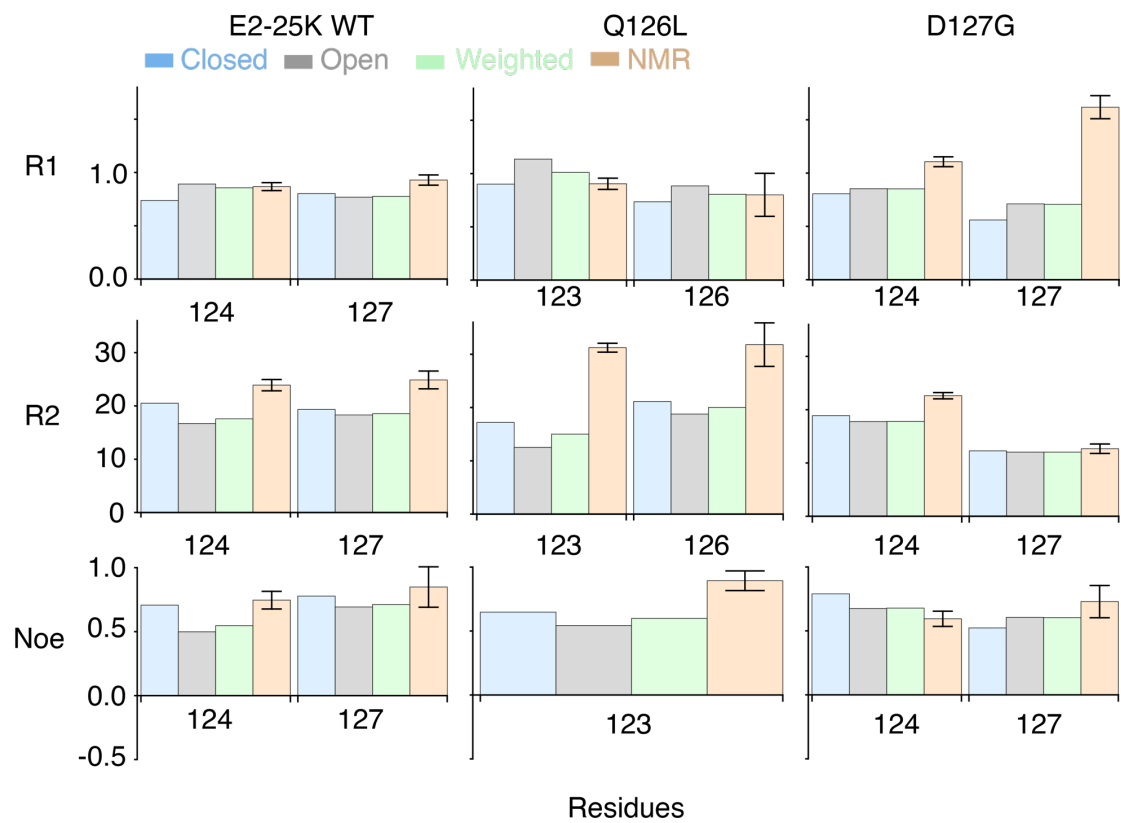

**Supplementary Figure S5.** Comparison of experimental and calculated 600 MHz backbone  $^{15}\text{N}$  relaxation data for E2-25K wildtype, Q126L and D127G. The active site loop encompasses residues 123-127.
